# Supplementary material for: Provenance and distribution of zinc in terrestrial planets
Source: Research Square preprint supplement (doi:10.21203/rs.3.rs-6888308/v1), 2025-06-16
Supplement: Supplementary file 1 [file 0854ede0873d055e7ec1cd7c.xlsx]

## Sheet: Sheet1
	Sample name	Group	ε66Zn	±	ε67Zn	±	Reference
	Orgueil	CI	0.21	0.03	-0.08	0.06	Steller et al. (2022)
	Orgueil	CI	0.32	0.06	-0.07	0.06	This study
	Orgueil	CI	0.09	0.28	-0.15	0.07	Martins et al. (2023)
	Orgueil	CI	0.33	0.049	0.02	0.122	Martins et al. (2024)
	Orgueil	CI	0.33	0.02	-0.15	0.09	Savage et al. (2022)
	Orgueil	CI	0.52	0.12			Paquet et al. (2023)
	Orgueil mean		0.3	0.106875
	Alais	CI	0.35	0.19			Paquet et al. (2023)
	Ryugu	CI	0.33	0.04			Paquet et al. (2023)
	CI mean		0.326667	0.0410961
	Jblilet Winselwan	CM2	0.24	0.02	-0.12	0.07	Steller et al. (2022)
	Jblilet Winselwan	CM2	0.22	0.1	-0.16	0.1	Martins et al. (2023)
	Jblilet Winselwan mean		0.23	0.1	-0.14	0.1
	Murchison	CM2	0.32	0.09	-0.15	0.09	Martins et al. (2024)
	Murchison	CM2	0.15	0.4	-0.22	0.05	Martins et al. (2023)
	Murchison	CM2	0.42	0.08	-0.21	0.28	Savage et al. (2022)
	Murchison	CM2	0.29	0.1			Paquet et al. (2023)
	Murchison mean		0.295	0.096566
	Winchcombe	CM2	0.19	0.11	-0.16	0.1	Martins et al. (2024)
	CM mean		0.238333	0.0865384
	MIL 090025	CO3	0.23	0.09	0.06	0.11	Martins et al. (2023)
	Lancé	CO3.4	0.25	0.04	-0.14	0.1	Savage et al. (2022)
	Kainsaz	CO3	0.23	0.03	-0.1	0.04	Steller et al. (2022)
	CO mean		0.236667	0.0188562
	Allende	CV3	0.23	0.05	-0.07	0.09	Martins et al. (2023)
	Allende	CV3	0.37	0.01	-0.19	0.29	Savage et al. (2022)
	Allende	CV3	0.25	0.01	-0.13	0.03	Steller et al. (2022)
	Allende	CV3	0.325	0.0895824			Paquet et al. (2023)
	Allende mean		0.29375	0.0564994
	NWA 4502	CV3	0.26	0.09	0	0.07	Martins et al. (2023)
	LAR 12002	CV3	0.31	0.15	0.03	0.17	Martins et al. (2023)
	Vigarano	CV3	0.28	0.02	-0.09	0.05	Steller et al. (2022)
	CV mean		0.285938	0.0183579
	Tarda	C2-ung	0.24	0.06	-0.14	0.05	Steller et al. (2022)
	Tarda	C2-ung	0.46	0.08			Paquet et al. (2023)
	Tarda mean		0.35	0.08	-0.14	0.05
	Tagish Lake	C2-ung	0.48	0.06			Paquet et al. (2023)
	Carbo	IID	0.23	0.03	-0.09	0.07	Steller et al. (2022)
	Canyon Diablo	IAB	-0.2	0.08	0.13	0.07	Martins et al. (2023)
	Canyon Diablo	IAB	-0.32	0.04	0.03	0.06	Steller et al. (2022)
	Canyon Diablo mean		-0.26	0.13
	Toluca	IAB	-0.04	0.001	0.13	0.02	Martins et al. (2023)
	Toluca	IAB	-0.1	0.09	0.17	0.08	Martins et al. (2024)
	mean		-0.07	0.13
	Nantan	IAB	-0.15	0.19	0.13	0.15	Martins et al. (2024)
	IAB mean		-0.16	0.155778
	Mt. Dooling	IC	-0.41	0.04	-0.22	0.09	Steller et al. (2022)
	Henbury	IIIAB	-0.34	0.04	0.03	0.06	Steller et al. (2022)
	Saint-Aubin	IIIAB	-0.27	0.12	0.14	0.24	Steller et al. (2022)
	IIIAB mean		-0.305	0.12	0.085	0.24
	Brownfield	H3	-0.19	0.15	-0.01	0.11	Martins et al. (2023)
	Forest Vale	H4	-0.16	0.07	-0.01	0.13	Martins et al. (2023)
	Beaver Creek	H5	-0.32	0.06	-0.01	0.05	Steller et al. (2022)
	Roosevelt	H3.4	-0.187	0.013	-0.147	0.029	Savage et al. (2022)
	H mean		-0.21425	0.0621626	-0.04425	0.0593227
	Tennasilm	L4	-0.37	0.23	0.11	0.09	Martins et al. (2023)
	Tennasilm	L4	-0.11	0.06	0.34	0.13	Martins et al. (2024)
	Tennasilim	L4	-0.27	0.03	0.12	0.11	Steller et al. (2022)
	Tennasilm mean		-0.25	0.23	0.19	0.13
	Saratov	L4	-0.21	0.13	0.01	0.18	Martins et al. (2023)
	Homestead	L5	-0.08	0.13	0.12	0.16	Martins et al. (2023)
	Umm Ruaba (B)	L4	-0.28	0.05	0.23	0.11	Steller et al. (2022)
	Bjurböle	L/LL4	-0.2	0.03	0.04	0.04	Steller et al. (2022)
	QUE 97008	L3.05	-0.15	0.08	0.09	0.22	Savage et al. (2022)
	L mean		-0.195	0.0534894	0.113333	0.0633626
	Bishunpur	LL3	-0.08	0.11	0.17	0.12	Martins et al. (2023)
	Soko Banja	LL4	-0.06	0.16	0.26	0.17	Martins et al. (2023)
	Soko Banja	LL4	-0.24	0.05	0.16	0.17	Steller et al. (2022)
	Soko Banja mean		-0.15	0.16
	NWA 5206	LL3.05	-0.16	0.1	0.09	0.1	Steller et al. (2022)
	Parnallee	LL3.6	-0.32	0.04	0.06	0.09	Steller et al. (2022)
	Ragland	LL3.6	-0.2	0.06	0.14	0.14	Steller et al. (2022)
	ALH 84126	LL3.4	-0.13	0.03	0.11	0.05	Savage et al. (2022)
	LL mean		-0.173333	0.0610404	0.114	0.0342228
	Indarch	EH4	-0.17	0.1	0.14	0.09	Martins et al. (2024)
	Indarch	EH4	-0.16	0.11	0.2	0.1	Martins et al. (2023)
	Indarch	EH4	-0.19	0.03	0.11	0.05	Steller et al. (2022)
	Indarch	EH4	-0.12	0.04	-0.1	0.11	Savage et al. (2022)
	Indarch mean		-0.16	0.0254951	0.0875	0.112999
	NWA 13299	EH3	-0.16	0.08	0.14	0.17	Martins et al. (2024)
	NWA 13299	EH3	-0.23	0.1	0.11	0.17	Martins et al. (2023)
	NWA 13299 mean		-0.195	0.1	0.125	0.17
	MIL 07028 EH3	EH3	-0.27	0.08	-0.12	0.15	Martins et al. (2024)
	PCA 91238 EH3	EH3	-0.17	0.12	0.24	0.2	Martins et al. (2024)
	LAR 06252 EH3	EH3	-0.24	0.09	0.13	0.09	Martins et al. (2024)
	Sahara 97072	EH3	-0.18	0.03	0.07	0.06	Steller et al. (2022)
	Abee	EH4	-0.1	0.05	0.17	0.06	Savage et al. (2022)
	EH mean		-0.187857	0.0512596	0.100357	0.0387486
	Almahata Sitta	EL6	-0.17	0.03	0.06	0.08	Steller et al. (2022)
	MAC 02837	EL3	-0.15	0.08	0.07	0.14	Steller et al. (2022)
	PCA 91020	EL3	-0.17	0.02	0.1	0.05	Steller et al. (2022)
	Atlanta*	EL6	-0.255	0.024	0.398	0.068	Savage et al. (2022)
	MAC 88136	EL3	-0.16	0.07	0.07	0.11	Martins et al. (2024)
	EL mean		-0.1625	0.00829156	0.075	0.065192
	NWA 11880	R3.5-4	-0.23	0.07	0.17	0.13
	NWA 11754	Ureilite	-0.3	0.08	0.22	0.21	Martins et al. (2024)
	NWA 11757	Ureilite	-0.28	0.13	0.13	0.17	Martins et al. (2024)
	NWA 11890	Ureilite	-0.32	0.05	0.26	0.05	Martins et al. (2024)
	ALH 77257	Ureilite	-0.31	0.05	0.16	0.07	Steller et al. (2022)
	EET 96293	Ureilite	-0.33	0.05	0.18	0.11	Steller et al. (2022)
	GRO 95575	Ureilite	-0.34	0.06	0.08	0.07	Steller et al. (2022)
	LAP 03587	Ureilite	-0.36	0.02	0.14	0.07	Steller et al. (2022)
	NWA 5938	Ureilite	-0.33	0.05	0.13	0.17	Steller et al. (2022)
	Ureilite mean		-0.32125	0.0163698	0.1625	0.0375416
	NWA 12265	Eucrite-melt breccia	-0.35	0.32	0.04	0.15	Martins et al. (2024)
	NWA 14443	Eucrite-unbrecciated	-0.26	0.11	0.18	0.07	Martins et al. (2024)
	NWA 8559	Howardite	-0.339866	0.042012	-0.216834	0.0323393	Martins et al. (2024)
	NWA 11395	Howardite	-0.25	0.26	0.53	0.06	Martins et al. (2024)
	Tatahouine	Diogenite	-0.09	0.09			Fang et al. (2024)
	Bilanga	Diogenite	-0.08	0.16			Fang et al. (2024)
	Johnstown	Diogenite	-0.11	0.09			Fang et al. (2024)
	NWA 5484	Diogenite	-0.02	0.23			Fang et al. (2024)
	Dho 700	Diogenite	-0.3	0.2			Fang et al. (2024)
	NWA 7831	Diogenite	-0.33	0.14			Fang et al. (2024)
	SAN 03473	Diogenite	-0.08	0.15			Fang et al. (2024)
	Y-74097	Diogenite	-0.37	0.19			Fang et al. (2024)
	Y 002875	Diogenite	-0.27	0.08			Fang et al. (2024)
	MIL 090159	Diogenite	-0.41	0.17			Fang et al. (2024)
	HED mean		-0.232848	0.0668927
	NWA 8287	Acapulcoite	-0.25	0.07	0.16	0.1	Martins et al. (2024)
	Djoua	Aubrite	-0.39	0.08	0.27	0.27	Martins et al. (2024)
	ALHA 77005	Shergottite	-0.104411	0.0923798	0.0352974	0.149115	This Study
	ALHA 77005	Shergottite	-0.03	0.28			Paquet et al. (2023)
	ALHA 77005 mean		-0.0672057	0.28
	ALH 84001	OPX	-0.13	0.28			Paquet et al. (2023)
	ALH 84001	OPX	-0.139779	0.0809881			This Study
	mean		-0.13489
	DaG476	Shergottite	0.04	0			Paquet et al. (2023)
	EETA 79001	Shergottite	-0.200955	0.0929184	-0.031376	0.1589	This Study
	EETA 79001	Shergottite	-0.05	0.18			Paquet et al. (2023)
	EETA 79001 mean		-0.125478	0.18
	LAR 12095	Shergottite	-0.08	0.07	0.16	0.07	This Study
	LAR 06319	Shergottite	-0.08	0.07			Paquet et al. (2023)
	MIL 03346	Nakhlite	-0.257071	0.122602	0.0462958	0.120681	This study
	MIL 03346	Nakhlite	-0.21	0.09	0.07	0.07	Kleine et al. (2023)
	MIL 03346	Nakhlite	-0.17	0.11			Paquet et al. (2023)
	MIL 03346 mean		-0.212357	0.0711713
	MIL 090032	Nakhlite	-0.25	0.03			Paquet et al. (2023)
	Nakhla	Nakhlite	-0.21	0.08	0.07	0.1	Kleine et al. (2023)
	NWA 1195	Shergottite	-0.23	0.03	0.15	0.11	Kleine et al. (2023)
	RBT 04262	Shergottite	-0.137639	0.0716542	0.0599592	0.090371	This Study
	RBT 04262	Shergottite	-0.14	0.07			Paquet et al. (2023)
	RBT 04262 mean		-0.13882	0.0716542
	Tissint	Shergottite	-0.21	0.04	0.09	0.07	Kleine et al. (2023)
	Tissint	Shergottite	-0.24	0.09			Paquet et al. (2023)
	Tissint mean		-0.225	0.09
	Zagami	Shergottite	-0.21	0.03	0.08	0.08	Kleine et al. (2023)
	Zagami	Shergottite	-0.08	0.2			Paquet et al. (2023)
	Zagami mean		-0.145	0.2
	BSM mean		-0.142981	0.0442177
	BCR-2		-0.07	0.03	0.04	0.05	Steller et al. (2022)
	BCR-2		-0.038	0.034	-0.08	0.07	Savage et al. (2022)
	BCR-2		0	0.04	0	0.05	Martins et al. (2024)
	BCR-2		0	0.04	0	0.05	This study
	BCR-2 mean		-0.027	0.0292746	-0.01	0.043589
	BHVO-2		-0.07	0.02	0.01	0.04	Steller et al. (2022)
	BHVO-2		-0.122738	0.105842	0.06	0.09	Martins et al. (2023)
	BHVO-2		0.014	0.024	0	0.07	Savage et al. (2022)
	BHVO-2		-0.07	0.15			Paquet et al. (2022)
	BHVO-2 mean		-0.0621846	0.048972
	JA-2		-0.09	0.02	0.03	0.08	Steller et al. (2022)
	BTHO		-0.00666667	0.14702	0.01	0.15	Martins et al. (2023)
	D-174		-0.0833333	0.075228	-0.1	0.19	Martins et al. (2023)
	P6Bt		-0.0849647	0.0857154	0	0.08	Martins et al. (2023)
	BIR-1		0.04	0.115	-0.08	0.13	Savage et al. (2022)
	DTS-1		0.043	0.022	0.01	0.08	Savage et al. (2022)
	BSE mean		-0.0338937	0.0363684
	70017-587	High-Ti Mare Basalt	-0.112935	0.069808	0.0299613	0.0718555	This study
	10017-423	High-Ti Ilmenite Basalt	0.294546	0.389462	0.442456	0.21278	This study
	15016-254	Low-Ti Olivine Basalt	-0.0996297	0.302488	0.0157685	0.16477	This study
	NWA 11182	Feldspathic breccia	0.183079	0.193687	0.398188	0.112072	This study
	NWA 11898	Feldspathic breccia	-0.291542	0.0644861	-0.174302	0.0420963	This study
	Moon mean		-0.00529625	0.190919	0.142414	0.213331
	*outlier not included in means
