# Supplementary material for: Provenance and distribution of zinc in terrestrial planets
Source: Research Square preprint supplement (doi:10.21203/rs.3.rs-6888308/v1), 2025-06-16
Supplement: Supplementary file 2 [file 30d73274749dc6467e7f7ac0.docx]

**Supplementary Information**

**Mass-dependent Zn isotope measurements**

The mass-dependent Zn isotope analyses of the Martian meteorites were performed with a double spike protocol and using a Nu Plasma HR MC-ICP-MS, as described in detail in previous studies36,39,40. In brief, aliquots of the initial rock solutions were first equilibrated with a 64Zn-67Zn double spike, followed by separation of Zn from the rock matrix by ion exchange chromatography with AG MP-1 anion exchange resin. The purified Zn fractions were then introduced to the MC-ICP-MS using a Cetac autosampler and a Cetac Aridus II desolvation system fitted with glass concentric nebulisers with nominal uptake rates of 100 μL/min. The typical measurement sensitivity achieved for Zn was 100 V (µg ml-1)-1. Each run involved monitoring the 64Zn, 66Zn, 67Zn, and 68Zn ion beams using Faraday cups fitted with 1011 Ω resistors for 60 data acquisition cycles of 5 s each. The ion beam intensities at mass numbers 62 (62Ni+) and 68.5 (137Ba2+) were also monitored for correction of isobaric interferences36.

The mass dependent Zn isotope compositions are reported using the δ66Zn notation, defined as:

The sample measurements were initially performed, and the δ66Zn values initially calculated, relative to bracketing analyses of the double-spiked AA-ETH Zn isotope reference material, using solutions with matching Zn concentrations and ratios of spike-derived to natural Zn41. To follow the convention of reporting δ66Zn values relative to the JMC Lyon Zn isotope reference material, all reported values were corrected for a δ66Zn offset of –0.28 between JMC Lyon Zn and AA-ETH Zn41. Due to the limited sample availability, this procedure was not applied to the Lunar samples. However, mass-dependent isotope results relative to the unspiked London Zn standard are reported in the main text.

The results for the Martian samples range from δ66Zn = +0.32 ± 0.03 to δ66Zn = +0.54 ± 0.02 relative to the JMC Lyon Zn isotope reference material (Table S1). The mean value (δ66Zn = +0.42 ± 0.15) is consistent with previous findings6,42 in defining a significantly heavier Zn isotope compositio

n for bulk silicate Mars compared to that of the BSE (δ66Zn = +0.16 ± 0.06 to +0.20 ± 0.05)43-46.

**Table S1. Mass-dependent Zn isotope compositions of Martian samples.**

| Sample | δ66Zn | 2SD | n | Zn (ppm) |
| --- | --- | --- | --- | --- |
| MIL 03346 | 0.32 | 0.03 | 4 | 55.8 |
| ALH 77005 | 0.54 | 0.02 | 4 | 51.5 |
| EET 79001 | 0.40 | 0.06 | 4 | 57.8 |
| LAR 12095 | 0.45 | 0.02 | 4 | 57.2 |
| RBT 04262 | 0.38 | 0.04 | 5 | 51.2 |
| ALH 84001 | … | … | … | … |


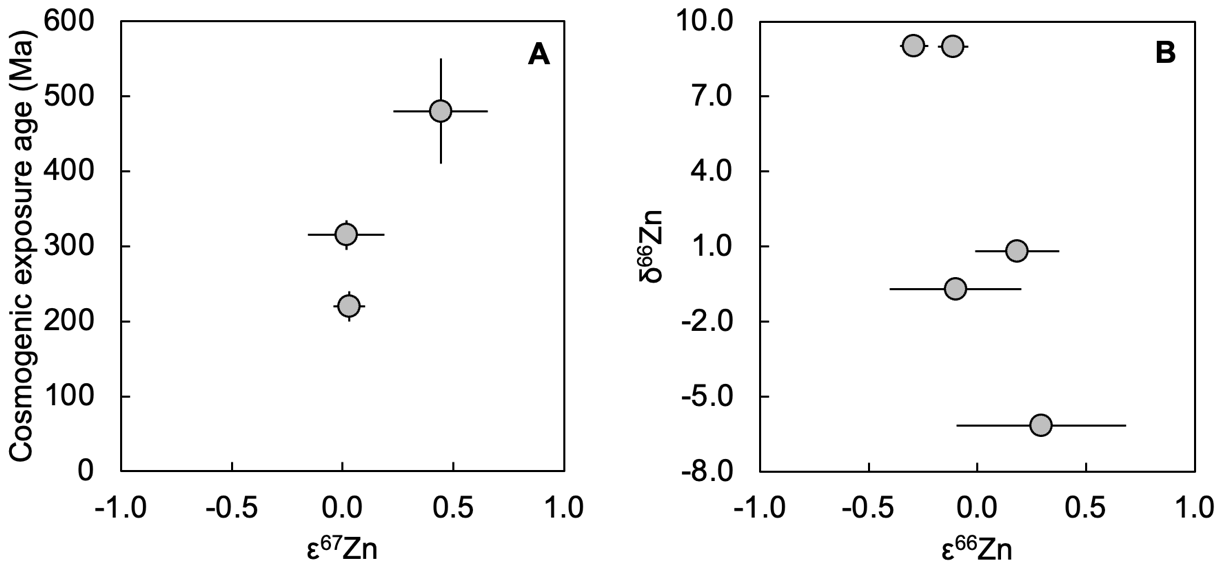


**Figure S1. Cosmogenic exposure ages and mass-dependent Zn isotope compositions of Lunar samples.** Panel (A) shows cosmogenic exposure ages relative to ε67Zn. Panel (B) plots the mass-dependent Zn isotope compositions reported as δ66Zn against mass-independent isotope composition (ε66Zn) obtained for the same samples

**Table S2. Mass-independent Zn isotope data for meteorite, Martian, Lunar and terrestrial samples employing the 66Zn/67Zn normalization.**

| **Sample name** | **Type** | **ε64Zn** | **2sd** | **2se** | **n** | **ε68Zn** | **2sd** | **2se** | **n** | **ε70Zn** | **2sd** | **2se** | **n** |
| --- | --- | --- | --- | --- | --- | --- | --- | --- | --- | --- | --- | --- | --- |
| MIL 03346 | Nakhlite | 0.81 | 0.61 | 0.23 | 7 | -0.32 | 0.47 | 0.13 | 14 | -1.01 | 0.76 | 0.29 | 7 |
| ALH 77005 | Shergottite | 0.44 | 0.30 | 0.11 | 8 | -0.28 | 0.57 | 0.15 | 14 | -0.89 | 0.30 | 0.12 | 6 |
| EET 79001 | Shergottite | 0.57 | 0.40 | 0.16 | 6 | -0.27 | 0.55 | 0.18 | 9 | -1.30 | 0.44 | 0.25 | 3 |
| LAR 12095 | Shergottite | 0.47 | 0.52 | 0.20 | 7 | -0.33 | 0.30 | 0.09 | 11 | -0.85 | 0.38 | 0.19 | 4 |
| RBT 04262 | Shergottite | 0.51 | 0.43 | 0.14 | 10 | -0.28 | 0.45 | 0.12 | 15 | -1.15 | 0.55 | 0.28 | 4 |
| ALH 84001 | SNC OPX | 0.56 | 0.60 | 0.17 | 12 | -0.29 | 0.56 | 0.16 | 12 | -0.44 | 0.99 | 0.29 | 12 |
| *Bulk silicate Mars* |  | 0.56 | 0.24 | 0.10 | 6 | -0.30 | 0.04 | 0.02 | 6 | -0.94 | 0.55 | 0.22 | 6 |
|  |  |  |  |  |  |  |  |  |  |  |  |  |  |
| 70017-587 | High-Ti Mare Basalt | 0.43 | 0.51 | 0.17 | 9 | -0.15 | 0.31 | 0.10 | 9 | … | … | … | … |
| 10017-423 | High-Ti Ilmenite Mare Basalt | -0.09 | 1.85 | 0.84 | 5 | -0.59 | 0.33 | 0.15 | 5 | … | … | … | … |
| 15016-254 | Low-Ti Olivine Basalt | 0.44 | … | 0.84 | 2 | -0.32 | … | 0.40 | 2 | … | … | … | … |
| NWA 11182 | Feldspathic breccia | 0.19 | … | 0.54 | 2 | -0.63 | … | 0.26 | 2 | … | … | … | … |
| NWA 11898 | Feldspathic breccia | 0.30 | 0.53 | 0.26 | 4 | 0.08 | 0.52 | 0.26 | 4 | … | … | … | … |
| *Lunar mean* |  | 0.25 | 0.40 | 0.18 | 5 | -0.16 | 0.56 | 0.25 | 5 | … | … | … | … |
|  |  |  |  |  |  |  |  |  |  |  |  |  |  |
| Orgueil | CI | -1.09 | 0.60 | 0.14 | 18 | 0.45 | 0.29 | 0.07 | 18 | 1.59 | 1.02 | 0.24 | 18 |
| BCR-2 | Terrestrial | 0.00 | 0.64 | 0.08 | 70 | -0.05 | 0.43 | 0.04 | 107 | -0.02 | 0.92 | 0.11 | 73 |

n is the total number of individual analytical runs for a given meteorite, for one or several powder/digest solution aliquots

**Table S3. Compiled isotope data for Mars.**

| {Losno, 2022 #1860} | **Value** | **95% CI** | **Reference(s)** |
| --- | --- | --- | --- |
| Δ17O | 0.25 | 0.06 | 47 |
| ɛ48Ca | -0.20 | 0.03 | 47, 48 |
| ɛ50Ti | -0.42 | 0.07 | 47, 48 |
| ɛ54Cr | -0.16 | 0.03 | 47, 48 |
| ɛ64Zn | 0.55 | 0.09 | This study |
| ɛ84Sr | -0.25 | 0.15 | 47 |
| ɛ96Zr | 0.28 | 0.03 | 48 |
| δ30Si | -0.46 | 0.07 | 49 |
| δ25Mg | -0.13 | 0.03 | 50 |

**Table S4. Compiled elemental concentration data for bulk silicate Mars.**

|  | **Concentration range** | **Reference(s)** |
| --- | --- | --- |
| Na (%) | 0.37 – 0.87 | 10-12, 51, 52 |
| Mg (%) | 16.46 – 19.90 | 10, 12, 51, 52 |
| Al (%) | 1.53 – 1.90 | 10, 12, 51, 52 |
| Si (%) | 20.50 – 22.20 | 10, 12, 51, 52 |
| P (µg g-1) | 675 – 740 | 10, 12, 51, 52 |
| Ca (%) | 1.43 – 2.06 | 10, 12, 51, 52 |
| K (µg g-1) | 305 – 360 | 10, 12, 51, 52 |
| Ti (µg g-1) | 600 – 1010 | 10-12, 51, 52 |
| Fe (%) | 11.40 – 14.10 | 10, 12, 51, 52 |
| Mn (µg g-1) | 2840 – 4800 | 10-12, 51, 52 |
| O (%) | 43.2 | 10 |
| Cr (µg g-1) | 4640 – 6000 | 10, 12, 51, 52 |
| Zn (µg g-1) | 19 – 83 | 10, 12, 51, 52 |
| Sr (µg g-1) | 13.5 – 17.6 | 10, 12, 51 |
| Zr (µg g-1) | 7.5 – 8.3 | 10, 12, 51 |
